# Supplementary material for: H3K9me2 orchestrates inheritance of spatial positioning of peripheral heterochromatin through mitosis
Source: eLife. 2019 Oct 1;8:e49278. doi: 10.7554/eLife.49278 (PMC6795522; doi:10.7554/eLife.49278)
Supplement: Figure 3—source data 1. [file elife-49278-fig3-data1.xlsx]

## Sheet: Sheet1
	Figure 3-source data 1. Corresponds to Figure 3C.
	C.elegans
	WT	cec-4 null	cec-4 rescue
	0.417836	0.345643	0.713377
	0.4165	0.310029	0.54018
	0.449448	0.342051	0.667801
	0.496912	0.303808	0.556269
	0.541541	0.268144	0.504023
	0.497253	0.256777	0.580979
	0.612966	0.299897	0.600255
	0.685314	0.30988	0.576387
	0.499913	0.206551	0.704566
	0.512086	0.269593	0.514702
	0.614177	0.454566	0.539446
	0.454362	0.253479	0.504295
	0.589401	0.26948	0.525291
	0.555661	0.284722	0.506121
	0.517602	0.292926	0.486147
	0.480372	0.31747	0.47945
	0.608264	0.271365	0.562228
	0.553969	0.318636	0.500469
	0.503825	0.34668	0.513401
	0.584198	0.37645	0.562871
	0.645492	0.285776	0.505718
	0.531386	0.326969	0.504904
	0.597329	0.252572	0.66617
	0.467132	0.364312	0.686227
	0.494684	0.239272	0.490003
	0.632482		0.50948
	0.607353
