# Supplementary material for: H3K9me2 orchestrates inheritance of spatial positioning of peripheral heterochromatin through mitosis
Source: eLife. 2019 Oct 1;8:e49278. doi: 10.7554/eLife.49278 (PMC6795522; doi:10.7554/eLife.49278)
Supplement: Figure 3—source data 2. [file elife-49278-fig3-data2.xlsx]

## Sheet: Sheet1
	Figure 3-source data 2. Corresponds to Figure 3E.
	H3-GFP / Lamin B						H3-GFP / H3K9me2
	wt	K9A	K9E	S10A	S10E		wt	K9A	K9E	S10A	S10E
	0.905864	0.590074	0.709238	0.861096	0.665826		0.764642	0.524822	0.820778	0.706563	0.648677
	1.19572	0.987045	0.889648	0.775918	0.691233		1.1273	0.854541	0.871205	0.863068	0.77481
	0.932124	0.476331	0.586973	1.14232	0.595037		0.80892	0.695442	0.810123	0.946512	0.614507
	1.29394	0.668501	0.818289	1.16574	0.56784		1.36251	0.678525	0.831057	1.27569	0.606075
	1.01806	0.730984	0.813454	0.969004	0.623031		1.16184	0.856472	0.852568	1.11913	0.649785
	0.854209	0.822915	0.736229	0.801179	0.764224		1.03639	0.688779	0.833957	0.984806	0.726593
	0.882049	0.67855	0.723764	1.0514	0.37853		1.16591	0.612478	0.760592	1.10962	0.443506
	1.06727	1.06852	0.640366	0.856917	0.789421		1.00483	0.979885	0.472178	0.812239	0.645644
	0.938967	0.657797	0.668787	0.828529	0.790198		0.882979	0.578261	0.679972	0.748902	0.752009
	1.0518	0.981749	0.743633	1.00452	0.822166		0.809488	0.931039	0.974399	0.876136	0.691311
	1.24316	0.836048	0.734708	0.735936	0.458272		1.02862	0.856723	0.795137	0.828142	0.481955
	0.899653	0.75	0.772433	1.13038	0.898989		1.03399	0.77	0.811877	1.06457	0.912419
	1.21481	0.838109	0.763043	1.02354	0.707711		1.05621	0.867102	0.744708	0.958936	0.733877
	1.19217	0.748366	0.709347	1.63688	0.628529		0.895294	0.76045	0.882738	1.30681	0.643302
	0.911001	0.582094	0.627489	0.874156	0.362271		0.867178	0.597446	0.614674	0.991655	0.349969
	0.835736	0.811686	0.785716	1.10814	0.890241		0.881929	0.634212	0.770293	1.12436	0.882474
	1.08138	0.937347	0.749106	0.907137	0.701813		0.857059	0.92443	0.612435	0.863177	0.62042
	1.19001	0.904198	0.853872	0.96026	0.753912		0.980179	0.911215	0.830962	0.989314	0.577107
	0.768923	0.608547	0.792943	1.08023	0.928547		1.11002	0.731814	0.686526	0.875598	0.741069
	0.791672	0.696379	0.656935	0.972944	1.1308		0.925888	0.793521	0.65409	1.0436	0.951222
	1.38445	0.606554	0.745751	1.23831	0.829519		1.22588	0.554632	0.794507	1.03286	0.613746
	1.08125	0.730014	0.741872	1.01802	1.02954		0.917419	0.895611	0.848503	1.03839	0.920413
	0.884567	0.769966	1.08826	1.20697	0.771454		0.90462	0.80822	1.19771	1.0001	0.702339
	0.813092	0.739425	0.843336	0.999877	0.780324		0.878141	0.724913	0.822278	0.917236	0.796776
	0.861891	0.842356	0.654944	0.965729	0.5867		0.963727	0.866144	0.656195	0.83476	0.765454
	0.983928	0.759345	0.672018	0.914053	0.727499		1.38552	0.918	0.657894	0.833844	0.718859
	0.941674	0.685662	0.88078	0.944069	0.826511		1.16393	0.81662	0.917907	0.991831	1.01019
	1.0321	0.566788	1.1151	1.0421	0.860802		1.08165	0.647856	1.02163	1.06227	0.732425
	1.09277	0.769626	0.51458	1.14322	0.78291		1.03621	0.775834	0.602226	1.03368	0.630456
	0.655737	0.730918	1.08922	0.985342	1.0269		0.681712	0.732971	1.04691	1.17512	0.922214
