# Supplementary material for: H3K9me2 orchestrates inheritance of spatial positioning of peripheral heterochromatin through mitosis
Source: eLife. 2019 Oct 1;8:e49278. doi: 10.7554/eLife.49278 (PMC6795522; doi:10.7554/eLife.49278)
Supplement: Figure 6—source data 1. [file elife-49278-fig6-data1.xlsx]

## Sheet: Sheet 1
	Figure 6-source data 1. Corresponds to Figure 6.
	Interphase mESC																																												Prometaphase-Metaphse mESC
	Cell 01		Cell 02		Cell 03		Cell 04		Cell 05		Cell 06		Cell 07		Cell 08		Cell 09		Cell 10		Cell 11		Cell 12		Cell 13		Cell 14		Cell 15		Cell 16		Cell 17		Cell 18		Cell 19		Cell 20		Cell 21				Cell 01		Cell 02		Cell 03
	LADs	non-LADs	LADs	non-LADs	LADs	non-LADs	LADs	non-LADs	LADs	non-LADs	LADs	non-LADs	LADs	non-LADs	LADs	non-LADs	LADs	non-LADs	LADs	non-LADs	LADs	non-LADs	LADs	non-LADs	LADs	non-LADs	LADs	non-LADs	LADs	non-LADs	LADs	non-LADs	LADs	non-LADs	LADs	non-LADs	LADs	non-LADs	LADs	non-LADs	LADs	non-LADs			LADs	non-LADs	LADs	non-LADs	LADs
	-0.3357	0.396257	-0.302238	0.316155	-0.0878901	0.436861	-0.099529	0.298587	-0.108348	0.536043	-0.398454	0.403634	0.199922	0.667119	-0.0766523	0.439338	0.0424724	0.1989	-0.421157	0.447393	-0.198799	0.851844	0.221009	0.587008	-0.161358	0.398199	-0.0257425	0.535414	-0.168184	0.513608	-0.232693	0.338573	0.0240263	0.0995669	-0.0831678	0.71165	0.0995827	0.0277223	-0.468179	-0.088507	-0.363494	0.294465			0.064765	0.924064	0.424295	0.73099	0.387851
	-0.3482	0.0994857	-0.30632	0.246302	0.849501	0.800912	-0.234742	0.10297	0.079328	1.00505	-0.173308	0.130835	-0.0300327	0.90097	0.328644	0.366675	0.23024	0.157541	-0.149131	0.248552	0.0496998	0.590867	-0.0679561	0.0480525	0.29895	0.740317	0.0257422	0.885907	-0.204665	0.41969	-0.231635	0.347982	-0.19221	0.134582	-0.066928	0.851643	-0.0995827	0.468679	-0.124125	0.0300919	0.112624	0.259856			1.0874	1.15521	0.434547	0.471765	1.04692
	-0.338151	0.431395	0.0257422	0.305423	-0.124295	0.917484	-0.0616591	0.67296	-0.228939	0.597718	-0.049755	0.522635	-0.0300323	1.09443	-0.0200217	0.77944	-0.196184	0.21457	-0.232312	0.146189	0.0496998	0.408704	-0.139528	0.727776	0.330235	-0.105907	-0.244173	0.406586	-0.254053	0.645539	0.0498213	0.127417	-0.271824	0.529305	-0.290542	0.978401	-0.149374	0.220757	-0.189836	0.509027	-0.181747	0.39262			0.885774	1.17874	0.0818	0.657921	0.210077
	-0.423032	-0.102538	-0.190287	-0.0993217	2.14675	1.04259	-0.137799	0.521147	-0.180886	1.09368	-0.215743	0.738789	-0.0424724	1.13329	0.0200217	0.631627	-0.340178	0.306716	-0.222882	0.115094	-0.134957	0.82321	0.32303	0.395478	-0.0818241	1.19071	-0.218021	0.818577	-0.268901	0.285562	-0.115289	0.436391	0.336663	0.193916	-0.268467	1.55247	-0.149374	0.227955	-0.175245	0.292076	-0.19631	0.309173			1.23437	1.18299	0.445622	2.28903	0.685829
	-0.26438	0.315183	-0.128711	-0.0559363	-0.0514843	1.49306	0.221382	1.00782	-0.214864	1.05073	-0.0654176	0.796081	-0.240259	0.655073	0.0994981	0.359862	-0.107867	0.312366	-0.207209	0.373075	-0.0257425	0.503103	-0.135912	0.626527	-0.105907	1.66576	-0.128712	0.446366	-0.434536	1.20116	-0.199285	0.647677	-0.260125	0.391941	-0.298784	0.437265	-0.199165	0.198689	-0.372376	0.481911	-0.336214	0.647047			1.4408	1.79817	1.35576	0.96238	0.66186
	-0.207334	0.494881	0.570642	0.67433	0.285261	1.54455	-0.232533	0.82731	-0.024026	-0.0339781	-0.232466	1.2192	1.01002	1.71691	-0.200043	0.493227	-0.226217	0.662565	-0.107788	0.555181	-0.0514849	1.08696	1.07705	0.662751	-0.0257422	0.493663	-0.0621476	1.58121	-0.13445	1.19585	-0.058173	0.789079	-0.120131	0.638031	-0.277773	0.425132	-0.270548	0.625252	-0.124125	0.657103	-0.245388	0.801181			1.21486	2.12061	0.25014	0.250149	0.629458
	-0.297307	0.749013	0.76601	0.776291	1.09183	0.0257422	-0.099529	0.254836	-0.174012	0.687275	0.262499	0.663538	0.523292	1.27902	1.72189	0.930616	0.653948	1.16924	-0.165866	0.415029	-0.0772274	1.05273	-0.154762	0.828008	-0.317089	0.460939	-0.196204	0.515882	-0.055212	0.596524	-0.0300323	1.37052	1.10109	0.77856	-0.183751	0.601862	-0.149374	0.194058	-0.127669	0.639232	-0.252622	1.11901			1.62468	1.04857	0.798139	0.717007	0.741636
	0.298457	0.434891	0.102969	0.844235	0.0257422	0.738773	-0.210719	0.801568	0.134629	0.8382	1.59134	0.675787	-0.315207	0.742987	0.0283152	0.753729	-0.236311	1.26033	0.0881104	0.572414	-0.0364051	1.0001	0.0720779	0.946404	-0.0996498	0.386316	-0.113632	0.364051	-0.27556	0.944496	-0.282513	0.261872	-0.0720779	0.906757	-0.0392054	0.239933	-0.149374	1.19676	0.0726484	0.553234	-0.23723	0.785241			1.63708	1.26671	1.25096	1.02425	0.746674
	-0.406	1.19383	0.0257422	0.955378	-0.223696	1.39872	-0.253007	0.929258	-0.411137	1.59392	1.18923	1.04315	0.107884	0.745038	-0.168112	0.740538	-0.218913	1.15204	0.264225	0.624615	-0.087349	0.620681	0.0679561	1.15003	-0.0257422	1.11429	-0.128711	0.473267	-0.198841	0.922099	-0.0300323	1.36802	-0.204847	1.38195	-0.156589	0.149392	-0.149374	1.59266	-0.11683	0.817797	-0.0490776	1.07971			1.73445	1.61987	0.763371	1.98547	1.07482
	-0.181621	1.05277	0.0772265	0.5399	0.0979695	0.54041	-0.193827	0.709577	0.12013	1.02502	-0.175042	0.547305	-0.0849448	0.770027	-0.298494	0.642955	0.388996	0.620736	-0.238556	0.102538	-0.184821	0.64181	-0.0942281	0.547026	-0.0617078	2.68642	1.53578	0.673037	-0.154404	0.657043	-0.189109	0.900095	-0.0961039	0.996085	-0.256183	0.725948	-0.199165	1.21592	-0.0300919	1.51873	-0.407069	1.24141			0.34985	0.725914	0.53793	1.58858	0.34951
	-0.173289	1.44254	-0.257424	1.07407	1.54011	1.72432	0.42437	0.678249	-0.189931	0.778078	0.229955	1.03732	-0.247042	0.857725	-0.417105	0.962277	1.02111	0.479333	-0.198841	1.33218	-0.128712	1.62914	0.144156	0.542251	-0.0560821	0.3982	-0.112139	0.755701	1.16445	0.91079	-0.290865	0.823313	-0.144156	0.634634	-0.219967	0.895074	0.0995827	0.908092	-0.210644	0.547622	-0.147233	0.50681			0.984485	0.528798	0.471364	0.843612	0.989362
	-0.26873	1.40996	-0.150037	0.425389	1.39012	1.09965	-0.0514849	1.23262	-0.199918	0.964726	0.114978	0.553028	-0.347596	1.28529	-0.103376	1.52051	0.0300323	0.862275	-0.0653836	0.696241	-0.0514843	1.53956	0.18075	0.320414	-0.149158	0.348774	-0.180195	1.20735	-0.0919824	0.909094	0.0498213	1.21471	-0.12596	0.713539	-0.106791	1.24389	-0.10678	1.18237	-0.210644	1.02638	-0.435198	0.64257			0.934203	0.555412	0.798359	1.32264	1.12001
	0.0300323	1.74936	1.34766	0.817673	-0.0985524	1.24118	-0.182026	1.59454	-0.16989	1.01934	0.32734	0.562968	0.627661	0.581402	0.0772643	1.13958	1.39171	0.539078	0.90076	0.76239	0.0728102	1.60228	-0.175752	0.0602501	-0.269036	0.778436	-0.180197	0.983098	-0.12596	0.565944	-0.0498213	0.891921	0.216236	1.12128	-0.303311	-0.117616	-0.277746	0.992875	0.173977	0.78239	-0.168937	0.836534			0.585202	0.231944	0.658543	1.90313	1.47366
	-0.178236	1.0993	0.274333	0.887432	-0.198589	1.86205	-0.134469	1.08461	0.024026	1.39584	-0.0900981	0.77141	0.0300323	0.841308	-0.110869	0.590611	0.102537	0.521286	1.11767	1.07739	-0.139375	1.18004	0.0942281	0.552597	-0.0874503	0.406652	-0.0514843	0.701394	-0.19221	0.744805	-0.155565	2.03867	1.14856	1.18449	-0.28497	0.0784109	-0.284131	1.06459	-0.15046	0.716609	-0.112624	0.488929			0.355444	0.538603	2.22796	0.673057	0.981885
	-0.205076	1.62416	-0.0257422	0.67733	1.26352	1.42144	-0.197105	1.38385	0.024026	0.874187	-0.150162	1.11882	0.0581096	0.720776	-0.0600652	0.943674	0.090097	0.796537	0.281096	1.40075	0.207768	0.540591	0.033978	0.778531	-0.08745	0.746523	-0.173836	2.62147	0.248596	0.421492	0.116346	1.57148	-0.024026	0.543649	-0.17017	0.361118	0.23434	0.854832	-0.175245	1.44647	-0.181747	0.421795			-0.115846	1.51222	2.14308	0.18209	0.357877
	0.0300323	1.741	-0.248589	0.847141	-0.0257422	0.2166	1.15947	0.529678	-0.236188	0.417074	1.42069	0.901446	-0.090097	0.369812	0.171728	1.68879	2.09551	1.20177	-0.192801	0.654602	-0.0878894	0.458947	-0.250214	2.07816	0.266948	1.23121	-0.117767	0.581013	-0.168182	0.87319	-0.0300327	1.03866	-0.0339781	1.46832	-0.398958	0.760543	-0.18099	1.31074	-0.0657103	1.85254	-0.0981551	0.220901			1.31709	2.06331	0.649022	0.867128	0.462278
	0.618708	2.02042	0.0364051	-0.0514843	0.0496472	0.390196	-0.128711	1.34364	-0.170401	1.00356	-0.187483	0.661183	0.470744	1.2985	-0.188134	1.84087	-0.0300323	0.0725051	2.06657	1.08116	0.840873	1.99862	-0.0480525	1.92833	-0.180197	0.852881	0.0514849	1.44156	2.07063	1.64478	-0.0654681	1.78437	0.024026	0.406928	0.0277223	0.740577	0.633262	0.437232	-0.108267	0.858106	0.111795	1.22127			0.575023	0.720039	1.40671	0.128235	0.862033
	-0.208268	0.624646	0.44749	1.16648	-0.111848	1.03497	1.56542	1.09281	-0.175892	1.4491	-0.0424724	1.04668	0.0600654	1.73636	-0.188134	0.686911	1.36861	0.802782	1.17637	1.52989	-0.180195	1.85956	0.12013	2.34481	-0.0772274	1.46679	-0.0257425	0.731167	-0.0580043	1.63448	-0.0654681	0.849448	-0.144158	1.65497	-0.145339	0.950211	-0.120363	0.619679	-0.23041	1.26423	-0.363494	1.46131			0.633432	0.79144	0.773125	1.21311	0.48823
	0.731464	0.840916	1.32256	1.8792	0.0364051	1.48835	-0.08789	0.96679	-0.0602954	1.10109	1.98216	1.79118	0.0600647	1.4059	-0.260285	1.05939	-0.0849448	0.246971	1.59853	1.69015	-0.0728102	0.984034	1.11132	2.73152	0.128711	1.43564	-0.0257425	0.555271	2.12424	0.0480525	0.0849448	1.21926	-0.159938	1.82486	-0.2202	0.227164	-0.163769	1.40604	0.11683	1.49776	-0.265671	1.119			0.848024	0.234475	1.07791	0.431054	1.3715
	-0.120131	0.650407	0.150038	0.644057	-0.0514849	0.804226	-0.0257422	1.24411	-0.159938	2.10534	1.01205	1.28933	1.88758	0.757687	-0.189913	1.14485	0.80125	0.749375	1.73986	1.22529	1.69984	0.900288	0.0961039	1.21326	-0.0985524	1.13648	-0.254836	0.772461	-0.024026	1.36699	-0.127417	1.21222	-0.144156	1.01934	-0.217858	0.705698	1.13036	1.14498	-0.0584151	-0.0300919	0.133325	0.468597			1.63365	0.431054	1.87839	0.716705	1.1457
	2.48714	2.02623	-0.397193	0.353388	-0.207768	1.1342	-0.0728102	1.24411	-0.096105	0.576623	2.01986	1.32094	-0.178239	0.506261	-0.160176	0.572426	-0.210226	0.90541	-0.15745	1.69015	1.21495	0.886524	-0.144156	0.441715	-0.218071	2.01948	-0.180195	1.52491	0.08203	1.55752	-0.114977	1.3858	0.159938	0.456499	-0.133856	0.240745	-0.09465	1.45978	0.0726484	-0.0902758	-0.234298	0.375115			0.688112	0.190502	1.57152	0.346334	1.19923
	0.240259	2.38766	1.846	1.14881	0.0257425	0.695038	-0.0514843	0.554931	1.48008	0.397785	-0.0300327	0.752063	0.487913	1.21606	-0.18162	1.61163	-0.14501	0.964425	-0.14501	1.49131	-0.171363	1.81628	3.07532	1.80278	-0.14562	1.03881	0.257422	1.94455	-0.058004	1.2885	-0.0900981	0.568723	3.07318	0.159938	-0.0392054	0.817894	1.63591	0.982055	0.297895	0.978473	-0.105711	1.13646			1.30715	0.477385	1.12375	0.431051	0.95425
	0.730204	2.34253	-0.102969	1.29992	-0.167136	0.257421	1.31336	1.35087	0.566685	1.11516	0.0849448	1.62177	0.362718	1.54479	-0.133282	1.60025	-0.0849448	1.8888	-0.13257	0.490108	0.128712	1.01643	-0.12596	0.807277	-0.102969	1.47536	2.34	0.574433	0.305802	1.72989	-0.120131	1.17679	2.53214	0.318168	-0.177817	1.71896	1.11065	1.11471	0.145297	1.10456	-0.0627175	1.07801			0.272278	0.670672	0.726532	1.14623	1.42938
	0.0300323	0.450485	-0.340895	1.14333	0.0496472	0.738294	-0.180197	1.26971	1.28024	1.25369	-0.10789	1.5261	-0.160855	0.646814	0.165033	2.29572	-0.0600654	1.3923	-0.15745	1.43162	-0.139375	2.22731	1.57385	1.91751	-0.0364051	1.01315	0.154453	1.11327	2.69094	2.03812	0.0600654	1.3463	2.425	0.432467	2.63449	0.956409	1.21537	0.166336	-0.212782	1.23414	0.027612	0.331351			0.413271	1.40624	0.65355	1.07411	1.37387
	-0.127417	0.412284	0.0364051	0.319572	-0.0364051	1.53906	2.66176	1.36435	1.56205	1.66051	2.23904	1.55913	-0.312454	1.14203	0.225098	1.7561	0.339779	2.13818	0.0300327	1.63414	-0.0728102	2.02038	-0.116009	0.720779	0.0514843	0.643562	0.0514843	0.644629	2.62816	0.340578	-0.0300327	1.0936	-0.193916	1.25719	0.22375	1.81345	0.411078	0.914846	-0.132832	1.23414	0.519497	0.828378			0.327722	1.25274	1.14174	1.22765	1.32004
	-0.0881383	1.77193	-0.109215	0.0772274	-0.167772	1.35239	0.184977	1.17087	-0.130082	0.951385	1.55566	0.745664	0.130823	0.921697	-0.0849455	0.820891	2.11118	0.480492	0.192634	1.39393	0.0514849	0.963134	-0.058004	2.37669	-0.0728102	0.691697	-0.113632	0.695047	-0.149986	1.72987	0.192885	1.56168	0.193916	1.85884	1.03246	1.36691	-0.249503	0.551209	0.260502	1.57721	0.027612	0.117149			0.327722	0.365527	0.381856	1.64304	0.550251
	-0.102537	1.12918	-0.205937	-0.171363	-0.0873066	1.39082	0.102969	0.651635	2.13209	1.25036	-0.146265	1.30076	-0.0300323	0.961046	2.63946	0.634662	-0.120131	0.210226	2.89993	0.332491	1.27401	0.411879	-0.0919821	1.60562	1.68246	1.20137	1.6848	1.28271	1.32144	2.05765	-0.180194	2.20668	-0.135912	2.5384	-0.133855	2.10715	-0.11089	1.81134	-0.115205	1.8327	0.358964	0.305302			0.787232	0.332763	0.63605	2.27474	1.70873
	-0.114977	1.39394	1.16172	-0.134957	0.167772	0.815992	-0.205322	0.334652	1.65779	1.15084	-0.238725	1.74979	-0.0725048	0.192636	2.57041	0.999084	-0.12546	0.162602	-0.102537	0.946959	-0.0985524	1.35056	-0.264118	1.15326	2.98613	1.52901	-0.134958	1.48195	1.04308	1.3732	0.921953	-0.0300323	0.227895	0.524455	0.509671	0.92514	-0.066928	1.08197	-0.240736	1.29972	-0.133325	1.94296			-0.137562	0.807343	0.580568	1.35774	1.04931
	0.242395	1.76587	-0.0979805	0.9469	-0.117489	1.08149	-0.0621473	1.73754	-0.259753	1.03313	-0.0581165	1.6733	-0.0424724	0.877348	-0.0849455	1.22133	-0.178222	0.850133	-0.0600647	0.328369	1.12395	0.436861	-0.296253	0.312341	0.0878894	1.29992	-0.17578	0.403042	-0.168184	0.985363	0.722031	1.67942	0.633925	0.387832	0.443561	1.53977	2.64068	1.944	0.120368	0.468121	0.027612	2.45388			0.159793	1.62634	0.88325	0.588465	1.89994
	0.14501	1.74954	0.0979806	0.587653	1.92898	0.753261	2.76679	0.571819	-0.220709	0.747517	-0.120131	-0.0300327	0.0725051	-0.0300323	-0.0283152	0.622934	-0.180194	0.625549	2.41189	2.2537	0.159619	1.41804	-0.24026	1.06739	-0.218431	1.55476	-0.159799	0.489101	2.43291	0.931481	-0.0498213	0.867041	-0.132352	1.47555	0.0277223	1.95723	1.31443	1.76424	-0.180552	1.54797	0.222861	2.24383			0.78724	0.703435	0.387479	0.200298	0.611282
	-0.107881	2.11935	-0.167809	0.308906	0.329068	0.867258	-0.231682	0.816264	-0.139623	2.37889	0.10789	0.750809	-0.235107	0.82104	-0.208155	1.54998	1.58306	0.443156	0.199922	1.60151	-0.207227	0.618887	-0.154478	0.504551	-0.0257425	1.27418	-0.344889	1.82396	1.78995	0.360394	0.0849448	0.390425	0.024026	3.14918	-0.0554452	1.63498	-0.0554452	1.52901	0.299151	0.358644	0.195249	2.25133			0.714013	1.37465	1.13367	0.902343	0.756239
	-0.269759	0.667119	0.109215	0.978202	-0.179053	1.51835	0.411874	2.22665	0.486689	1.89346	-0.107871	1.65685	-0.130823	0.574925	2.54855	1.24309	0.149175	0.77013	-0.180194	2.29351	-0.087349	1.26298	1.41713	0.624675	-0.134957	2.65757	-0.0560697	1.70462	-0.261872	0.0240263	2.32116	0.312764	-0.0720788	1.29083	0.15448	1.39558	-0.184544	1.63515	-0.0300919	0.893685	-0.133325	1.20188			1.414	1.00492	1.18592	2.27879	1.35606
	-0.0300324	1.50802	0.0257422	1.44158	-0.0615644	1.00868	2.06394	1.79926	-0.0843213	0.917407	-0.149265	0.865786	-0.165966	0.132569	1.23757	1.83219	0.0881235	1.0794	0.696309	1.13432	-0.182026	0.97402	0.0480519	1.66493	-0.0621473	0.59207	-0.0364051	0.510427	-0.096105	1.32143	3.43453	0.385514	-0.164061	2.50583	0.0277223	0.94093	-0.066928	1.56625	-0.145297	1.094	-0.144761	2.53391			1.20649	2.84753	0.505943	0.928761	0.735101
	1.05945	1.832	0.345311	1.18956	0.0992944	1.36348	-0.0728102	1.81263	-0.024026	0.144157	-0.0581163	0.97561	-0.261646	0.719853	-0.0400434	0.260285	-0.120129	2.22242	1.57499	1.16967	0.0257422	0.571278	-0.144526	1.35912	0.386137	0.72078	-0.246787	0.973786	1.19346	1.49503	1.78321	0.339779	-0.0240263	1.3732	-0.106791	1.46684	-0.156822	1.36123	-0.0726484	0.325705	-0.13806	0.934089			0.327723	2.17261	0.48521	1.62876	0.870926
	-0.0300324	1.74137	-0.283164	1.54455	0.0257425	0.78842	1.72411	1.02969	2.45639	0.227895	-0.196253	0.944699	-0.116219	0.322509	0.140152	0.669848	0.924973	0.570621	1.06038	0.810873	-0.253007	0.347143	0.130083	1.36536	2.54067	1.26352	-0.137882	0.113632	-0.139451	1.46558	1.56168	0.465063	-	1.25719	0.830859	0.304948	1.31166	1.00712	1.31421	1.98965	0.144761	0.570364			0.391143	2.04922	0.045162	2.22375	0.227639
	-0.196225	3.0333	-0.182025	0.884158	-0.0816662	1.32566	0.0980642	1.10693	-0.216236	1.53546	-0.0995101	1.35147	-0.495007	0.357372	-0.0400434	1.03937	-0.114977	0.399845	-0.107788	0.254834	-0.0257425	0.902806	0.270118	0.823288	-0.154455	0.757194	0.257425	0.981018	-0.199368	0.816883	-0.120129	0.570621		0.65611	0.283952	0.582174	1.02574	1.26109	-0.265664	1.60374	2.69262	1.65413			1.33482	1.75419	0.501522	1.17039	0.415751
	-0.130817	1.25464	-0.266405	0.33648	-0.189075	0.369387	0.714974	0.757194	-0.0919824	2.12355	-0.224104	0.961046	-	0.557295	1.42156	1.36717	-0.116182	1.20129	-0.196151	0.837008	-0.167913	0.763736	-0.084276	0.802818	-0.11779	0.639138	-0.402479	1.41582	-0.135912	0.975411	2.95171	0.636339		2.54835	-0.0277226	0.852473	1.30329	0.987964	-0.0425564	0.902758	2.11557	0.13806			1.13028	1.36897	0.872988	1.15955	1.61198
	-0.0581061	1.2317	-0.205939	0.798016	1.34134	0.632791	0.698361	0.436861	-0.079328	1.83158	-0.174349	0.995288		0.165966	-0.0766523	0.209935	0.0300323	0.120129	-0.107856	0.898994	-0.098012	0.23452	0.033978	0.227895	-0.0617078	0.154453	-0.149136	1.8824	-0.320091	2.70421	2.17263	1.34546		2.1746	-0.277223	0.637335	0.11089	1.26246	0.120368	1.32252	2.44174	1.92058			1.77546	0.466344	0.65298	1.57548	0.583382
	0.116212	1.81981	-0.499192	0.372639	-0.148942	0.415372	-0.0616591	0.540592	-0.203868	1.39121	-0.29853	0.739624		0.800062	0.0200217	0.141576	0.980922	0.805721	2.80044	2.12362	-0.14332	0.385525	-	1.38315	0.0498249	1.4562	0.0818123	1.45543	0.209845	1.48508	-0.33963	1.92209		0.871771	-0.0497973	0.502501	-0.0392054	0.388116	0.115205	0.963793	-0.117149	2.42571			1.42713	0.750315	0.763371	1.21803	0.088057
	0.486755	0.150162	-0.278409	1.33529	-0.0992944	0.661371	-0.109215	0.795937	-0.110603	1.32756	-	0.624646		0.0300323	-0.140154	0.560615	0.204304	0.630679	-	0.382252	-0.294036	0.553437		1.41755	-0.0772265	1.88196	-0.0514849	1.65331	0.0994206	0.854283	0.137973	2.02374		0.839499	-0.331846	0.484158	0.0392054	0.582175	0.846732	1.75245	-0.193284	1.9113			1.78783	0.463818	0.584996	2.33336	1.14023
	-0.173289	1.12082	-0.347626	1.09735	-0.179053	1.10252	-0.0980642	0.48469	-0.0679561	1.4511		2.15365		0.321711	-0.134507	0.82114	-0.385065	0.132569		1.24377	-0.124295	1.01145		2.28249	-0.0257422	2.44553	-0.266903	1.55476	-0.220848	0.624683	-0.10794	0.683675		1.6635	-0.391761	1.28672	0.332667	0.582168	2.32781	1.56428	-0.0390497	1.22232			0.669091	0.379097	0.789101	0.640294	0.659691
	-0.130817	1.10606	-0.353901	0.417297	-0.307822	2.388	0.0621473	0.746523	0.0480525	0.346791		0.420458		1.27712	-0.188491	0.141576	-0.123486	-0.0424724		2.01153	-0.182026	0.45699		2.00411	-0.112164	2.47128	-0.17578	0.872676	-0.217942	0.635631	-0.0424724	0.792725		1.42041	-0.206386	1.16435	-0.0277223	1.76949	-0.292933	1.95658	0.0666618	1.00926			0.635053	0.250153	0.851854	0.936887	0.769277
	-0.215762	2.99405	-0.329342	0.612118	-0.155219	1.92862	-	0.720789	-	0.399837		1.79616		0.886451	0.537416	2.35879	-0.09945	1.43162		0.284867	-0.179184	1.49525		0.581749	0.0772265	2.05377	-0.221495	0.392858	0.477288	0.544446	0.0424724	1.54562		1.86286	-0.0995946	2.10006	0.102579	1.91333	-0.258687	0.255339	0.027612	0.934357			0.629885	1.55777	0.917365	1.15616	0.990493
	0.107849	0.57275	-0.148983	1.09803	-0.155219	1.66149		0.772265		0.57663		2.62313		1.41358	-0.120132	2.15195	-0.222935	1.34976		0.70247	0.165117	1.12382		0.149987	-0.308906	1.53109	-0.149434	0.643554	-0.0919824	1.58702	-0.0600654	0.722554		1.85232	0.647365	1.22176	-0.0633738	1.70196	0.0851129	0.248251	-0.133324	0.105389			0.602162	0.978845	1.72465	0.768006	0.614276
	0.175043	1.24763	-	0.28532	-0.154453	0.285261		1.59601		0.851877		0.57979		0.654115	0.0600652	1.20499	0.09945	1.58907		0.806976	0.1607	1.52927		0.38442	-0.185123	1.36207	-0.0996224	0.231682	-0.0339781	1.91222	0.509669	0.288752		0.33978	-0.233548	1.67681	-0.15447	1.99144	-0.10274	0.322167	0.105389	1.00348			0.339206	0.90583	0.490451	1.1565	0.215223
	0.0849448	1.21982		0.527336	-0.134375	1.62051		0.782176		1.05511		1.42453		0.347596	-0.133283	1.3815	-0.398269	1.0069		0.688757	-0.0257422	0.322504		1.99418	0.0985524	1.09215	-0.199245	1.34009	-0.212114	0.672735	-0.160968	0.446567		0.956917	0.0277223	0.637612	0.56398	2.36428	-0.088507	0.448718	1.32509	1.17532			-0.004954	0.967869	0.480195	0.976633	0.564611
	0.544861	2.23674		0.305424	-0.248236	0.590485		2.45447		0.888326		0.750809		0.560418	-	1.37915	0.174272	1.46872		1.42346	-0.17578	0.630682		0.466446	-0.0772265	0.571819	-0.319572	1.81694	-0.12596	0.440008	-0.0300327	1.02542		0.920526	1.40616	0.880915	-0.205159	2.04905	-0.0851129	1.23401	-0.161701	-0.0390497			0.644824	0.90563	1.7713	0.379098	2.05749
	0.503649	1.17309		0.738905	1.45205	0.441117		0.703992		0.678602		0.937413		0.923583		0.756216	-0.13079	0.298349		1.09184	-0.207768	0.922311		0.720779	-0.182026	0.400456	-	1.18339	-0.244874	2.38609	-0.0300323	0.385513		1.87296	0.882366	1.74786	0.334735	1.89782	1.13573	1.10489	-0.0490776	1.27781			1.31473	0.504527	1.66433	0.597196	1.54041
	-0.114977	1.59952		0.304241	0.134375	0.0514843		0.509672		0.718551		1.34087		0.958962		1.39431	-0.107816	1.20129		1.29808	1.68944	0.467653		1.92549	-0.161989	1.03442		1.361	-0.248552	0.329828	-0.189109	0.173462		0.76386	2.71469	1.03932	0.117616	0.273289	1.55345	1.52775	-0.117149	0.992421			1.85999	0.948676	1.31464	0.751197	1.86198
	-0.0600648	1.28523		0.198644	-0.1607	0.159534		0.10297		0.701314		0.955893		0.611129		0.736194	-0.13079	1.47159		1.3304	0.333776	0.109215		0.533697	-0.0996498	2.16237		1.53679	-0.120131	0.608188	-0.0654681	-		1.25013	2.65894	0.823314	0.112434	0.670101	1.4447	0.626768	0.0942738	0.179867			1.07601	0.431051	1.17243	0.695176	1.06775
	0.2383	0.531393		0.61081	-0.171363	0.379131		1.50172		0.325503		0.217515		0.380619		0.796648	-	1.23133		0.827774	-0.165116	0.912266		1.75389	0.168246	2.00791		0.602732	-	0.716577	0.382252			0.854551	-	0.556826	0.138613	0.494245	-0.300408	2.07371	0.0666618	1.12044			2.06447	0.368056	1.647	0.56383	0.415753
	0.188923	0.572696		0.193551	-0.180197	0.415372		1.58709		0.406168		0.92586		1.01707		1.48691		0.120131		0.827076	-0.0817134	0.61568		1.27338	-	1.4265		0.14562		0.36039	-0.058173			0.941433		0.490059	0.0831668	0.352849	-0.0584151	0.679953	0.027612	0.650725			2.35346	0.131126	1.97465	0.657101	0.541915
	-0.379531	0.820787		-0.154453	-0.0514849	-0.0364051		0.207768		-		0.91932		0.723341		1.03937		0.709591		1.31843	0.117578	0.521301		1.00909		1.70966		1.1214		1.03313	0.116346			0.477193		2.21882	-0.0569888	0.411082	0.100136	1.3289	-0.168937	1.08694			2.55489	0.463813	0.807848	0.439002	0.756239
	-0.165955	0.7849		0.0364051	-	1.54427		0.864788				1.48404		0.270291		1.01718		0.883388		0.3149	0.355977	1.13232		0.898753		0.534974		0.219694		0.641644	-0.238877			1.19587		1.1511	-0.0277223	1.32275	-0.0601839	0.150204	-	0.537178			2.32307	0.180699	1.64735	0.579784	1.54604
	-	0.339212		0.316983		0.615167		0.298587				0.450622		0.620484		1.0609		0.667118		1.17041	-0.210563	0.978213		0.816122		0.451941		1.54242		0.50073	-			1.39876		0.36039	0.120363	1.91598	0.240736	0.182541		0.687513			1.38117	1.50476	1.39439	0.346334	1.50939
		-		0.305424		-		0.0257422				1.94788		0.618238		1.81561		1.0172		0.392302	-	0.0817134		0.805297		0.353388		0.493574		0.893101				0.127357		0.887113	0.0946506	0.588082	-0.189836	0.951291		0.826679			2.21284	0.598251	1.70179	0.631889	1.07429
				0.738905				0.695038				1.66641		0.983952		0.416434		0.991079		1.13271		0.149099		1.04452		0.443057		0.975262		0.430693				0.832055		1.45304	0.117616	0.968653	-0.0425564	0.564301		1.06685			0.629885	0.767399	1.18074	0.708612	1.01245
				0.307877				0.436861				0.224104		1.26173		0.820891		0.127417		0.696939		0.576617		0.74716		2.12584		1.01319		0.356278				0.889276		0.28973	-0.0497913	0.985705	0.0584151	0.525736		0.723994			1.2101	1.04134	1.31935	0.409505	1.38688
				0.775882				0.664577				1.0461		1.17145		0.660806		0.45046		1.21938		-		0.36622		1.02653		0.866788		0.480403				0.170829		0.483675	-0.0497913	1.33067	1.91568	0.124125		0.512479			1.56446	0.556226	1.05662	0.425431	1.00151
				0.330235				-				0.819104		0.662241		1.19346		0.917431		1.1796				0.36622		2.60569		1.46947		0.717557				-		0.316893	-	0.0392054	-0.088507	0.0657103		0.645243			0.489301	1.38889	0.608683	0.240346	0.060222
				0.518346								1.52934		0.735517		0.563522		0.406636		1.14001				0.222434		1.56844		1.60033		0.50073						0.281237		1.87705	-0.120368	-0.158551		0.706683			1.71384	0.998181	1.30397	0.81728	0.655857
				0.107421								1.63194		0.660712		0.413489		0.312366		1.02323				0.491774		0.716552		1.43488		-0.0580043						0.221778		0.455428	-0.210644	-		-			1.75501	0.878025	1.45142	0.346334	0.886067
				-								1.00806		0.567598		0.650615		0.624646		0.905575				-0.115502		1.54958		1.11462		0.324113						2.1307		1.43343	0.166898						2.60934	0.081902	1.40724	0.958863	0.748938
												0.712758		0.823896		0.189913		0.175043		0.348468				0.879785		1.76787		1.37705		-0.0994206						2.402		0.931853	-0.198543						2.11395	0.754669	0.6604	0.663533	1.16092
												1.19236		0.452624		0.397637		1.82169		0.196151				0.908865		1.2861		0.604568		0.0480525						-		0.981243	-0.0902758						1.21523	1.01931	1.30394	1.02425	0.065269
												1.39161		1.04084		0.165033		1.0792		0.218878				0.596527		2.04522		0.474301		0.898196								1.40013	-0.0601839						1.48985	1.14943	1.82903	0.253666	0.152208
												0.820164		0.782096		0.804491		1.32745		0.107788				0.937013		1.00322		-		1.32189								0.52591	-0.131421						1.87189	0.231944	0.981039	1.61849	1.17056
												0.684795		0.961918		-		0.804288		0.560685				2.2845		1.03522				-								1.00978	-						1.35856	1.9501	0.402971	1.53512	0.553407
												1.03774		0.463314				0.185526		-				0.0240263		0.83578												1.59244							0.604342	0.267237	0.770024	1.47547	0.39902
												0.369542		0.392558				0.399479						-		2.52276												0.724835							-0.147503	0.200305	0.634425	1.80815	0.614276
												1.10606		-				0.0424724								1.34597												1.1088							1.23987	0.940005	0.423473	0.485336	0.242124
												0.174349						0.947117								1.30779												0.364386							0.95775	1.19336	0.968849	1.00159	0.342389
												-0.049755						1.60151								0.913734												1.30321							0.825915	0.478951	1.94638	0.499405	1.84146
												-						1.32994								0.861231												0.24711							1.52613	0.988016	0.618164	-0.057921	0.150139
																		0.314341								-												0.994347							1.1588	0.18561	0.541323	0.174819	1.82901
																		-																				1.07872							0.731263	-0.040279	-0.0055	0.776411	1.64521
																																						1.41152							0.930024	0.016736	0.995057	0.777232	0.240055
																																						1.4435							0.272277	0.16895	0.589411		0.460326
																																						0.305945							1.85776	-0.245262	1.10092		0.531506
																																						0.551209							1.42312	-0.018557	1.1417		0.184249
																																						-							2.07821		1.19231		0.204851
																																													0.909906		0.645319		2.15873
																																													0.512268		0.449581		1.7802
																																													0.66039		1.38117		1.21884
																																													0.779266		1.4871		0.689831
																																													1.08411		0.197031		0.702056
																																													0.984863		1.3716		0.985224
																																													0.327723		0.372811		0.79221
																																													0.642243		1.69011		0.546105
																																													0.582009		1.56047		0.691062
																																													0.831693		0.917812		0.270028
																																													0.786709		0.248514		0.25049
																																													-0.127329		0.591243		0.48823
																																													0.355444		0.428714		0.714494
																																													0.727318		0.583164		0.270026
																																													0.046318		0.387479		1.08212
																																													0.094777		0.34986		0.975368
																																													-0.119728		0.372811		0.719732
																																													0.327722		-0.049022		0.415753
																																													0.454563		0.212521		1.16411
																																													2.51296		0.518201		1.13241
																																													2.03673		0.100559		0.34951
																																													1.21778		1.21047		0.453028
																																													0.426841		0.798767		-0.061856
																																													0.456741		0.636484		0.074495
																																													1.48077		0.031915		0.02288
																																													1.72479		0.904361		0.154272
																																													1.34471		0.726532		0.035294
																																													1.3812		0.892069		0.074497
																																													0.42046		1.2454
																																													0.339206		0.5357
																																													0.25015		0.70404
																																													2.21722		0.742656
																																													0.617102		0.471364
																																													1.13305		0.591183
																																													0.648621		0.698882
																																													2.02863		0.351486
																																													2.12273		0.798137
																																													0.34985		0.954437
																																													0.743568
																																													0.521784
																																													0.05525
																																													0.001345
																																													-0.012672
																																													0.150449
[truncated: 65 more columns]
