# Supplementary material for: H3K9me2 orchestrates inheritance of spatial positioning of peripheral heterochromatin through mitosis
Source: eLife. 2019 Oct 1;8:e49278. doi: 10.7554/eLife.49278 (PMC6795522; doi:10.7554/eLife.49278)
Supplement: Supplementary file 1. [file elife-49278-supp1.xlsx]

## Sheet: Info
	Supplementary File 1
	Table 1. Genomic coordinates (mm9) of regions targeted with oligopaint DNA probes.

## Sheet: Table 1
	Supplementary File 1. Genomic coordinates (mm9) of regions targeted with oligopaint DNA probes.
		start	end	type	size			start	end	type	size
	chr1	29104230	29354230	LAD	250000		chr1	36434433	36684433	non-LAD	250000
	chr1	150673087	150923087	LAD	250000		chr1	135865407	136115407	non-LAD	250000
	chr1	174920593	175170593	LAD	250000		chr1	183973123	184223123	non-LAD	250000
	chr10	100527334	100777334	LAD	250000		chr10	94872520	95122520	non-LAD	250000
	chr10	124051755	124301755	LAD	250000		chr10	110869061	111119061	non-LAD	250000
	chr11	13179019	13429019	LAD	250000		chr11	4582747	4832747	non-LAD	250000
	chr11	92370539	92620539	LAD	250000		chr11	77940228	78190228	non-LAD	250000
	chr12	93813781	94063781	LAD	250000		chr12	70473766	70723766	non-LAD	250000
	chr12	115634346	115884346	LAD	250000		chr12	111962534	112212534	non-LAD	250000
	chr13	7489538	7739538	LAD	250000		chr13	47028288	47278288	non-LAD	250000
	chr13	88441235	88691235	LAD	250000		chr13	63199709	63449709	non-LAD	250000
	chr14	38703956	38953956	LAD	250000		chr14	21358915	21608915	non-LAD	250000
	chr14	113906951	114156951	LAD	250000		chr14	70419884	70669884	non-LAD	250000
	chr15	20289182	20539182	LAD	250000		chr15	75828606	76078606	non-LAD	250000
	chr15	70422540	70672540	LAD	250000		chr15	85276609	85526609	non-LAD	250000
	chr16	61890914	62140914	LAD	250000		chr16	10659379	10909379	non-LAD	250000
	chr16	82120430	82370430	LAD	250000		chr16	94760705	95010705	non-LAD	250000
	chr17	39538078	39783931	LAD	245853		chr17	28970900	29220900	non-LAD	250000
	chr17	61496613	61746613	LAD	250000		chr17	47803613	48053613	non-LAD	250000
	chr18	27523365	27738657	LAD	215292		chr18	61099822	61349822	non-LAD	250000
	chr18	88450557	88700557	LAD	250000		chr18	75521659	75771659	non-LAD	250000
	chr19	19633267	19883267	LAD	250000		chr19	3551051	3801051	non-LAD	250000
	chr19	35509829	35759829	LAD	250000		chr19	45622537	45872537	non-LAD	250000
	chr2	15379049	15629049	LAD	250000		chr2	5573731	5823731	non-LAD	250000
	chr2	86720000	86970000	LAD	250000		chr2	90721129	90971129	non-LAD	250000
	chr2	148980799	149230799	LAD	250000		chr2	165772679	166022679	non-LAD	250000
	chr3	71596078	71846078	LAD	250000		chr3	9641987	9891987	non-LAD	250000
	chr3	110735097	110985097	LAD	250000		chr3	89658552	89908552	non-LAD	250000
	chr3	13525990	13775990	LAD	250000		chr3	107840306	108090306	non-LAD	250000
	chr4	50271294	50521294	LAD	250000		chr4	44223436	44473436	non-LAD	250000
	chr4	92067850	92317850	LAD	250000		chr4	154687066	154937066	non-LAD	250000
	chr5	40813624	41063624	LAD	250000		chr5	65928768	66178768	non-LAD	250000
	chr5	60638162	60884800	LAD	246638		chr5	143797763	144047763	non-LAD	250000
	chr6	20389410	20639410	LAD	250000		chr6	86325063	86575063	non-LAD	250000
	chr6	139025301	139275301	LAD	250000		chr6	113420393	113670393	non-LAD	250000
	chr7	59721791	59971791	LAD	250000		chr7	86892565	87142565	non-LAD	250000
	chr7	97983011	98233011	LAD	250000		chr7	105952531	106202531	non-LAD	250000
	chr8	17936222	18186222	LAD	250000		chr8	34947799	35197799	non-LAD	250000
	chr8	50541295	50791295	LAD	250000		chr8	123933822	124183822	non-LAD	250000
	chr9	12396200	12646200	LAD	250000		chr9	44431734	44681734	non-LAD	250000
	chr9	80651724	80901724	LAD	250000		chr9	56821780	57071780	non-LAD	250000
